# Supplementary material for: Treatment adequacy of anxiety disorders among young adults in Finland
Source: Springer Nature journal article supplement (doi:10.1186/s12888-016-0766-0), 2016-03-15

**Additional file 1: Figure S1 Mental Health in Early Adulthood in Finland (MEAF) study flow**

Adapted from Suvisaari et al. 2009, courtesy of Cambridge University Press.

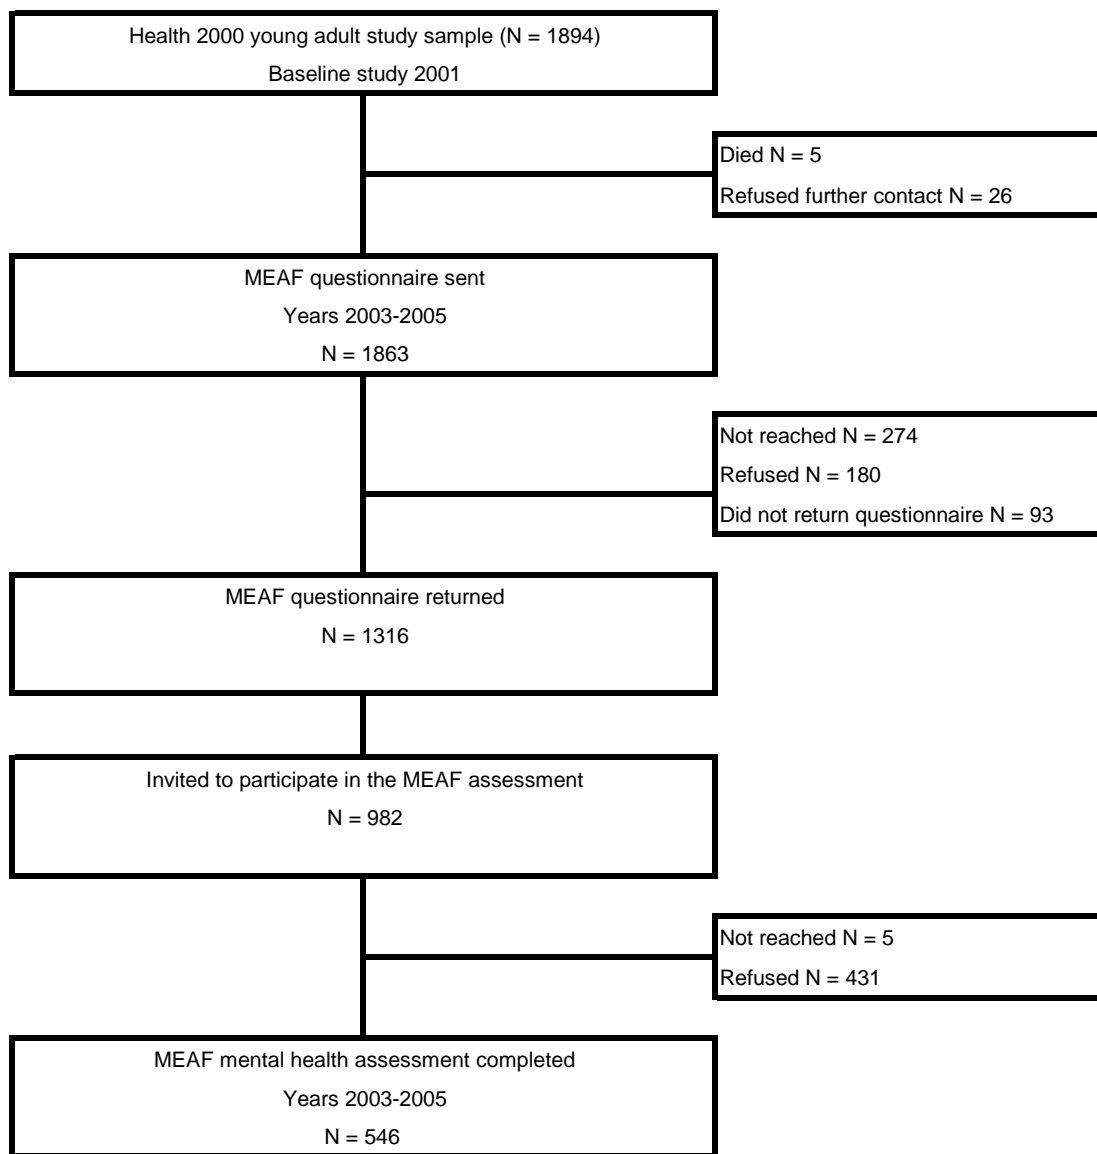

Supplement: MOESM1 [file 9748452]
